# Supplementary material for: Peripheral zone volume ratio (PZ-ratio) is relevant with biopsy results and can increase the accuracy of current diagnostic modality
Source: PubMed Central journal article supplement (PMC5471015; doi:10.18632/oncotarget.16753), 2017-03-31
Supplement: oncotarget-08-34836-s001.pdf [file oncotarget-08-34836-s001.pdf]

# Peripheral zone volume ratio (PZ-ratio) is relevant with biopsy results and can increase the accuracy of current diagnostic modality

## Supplementary Materials

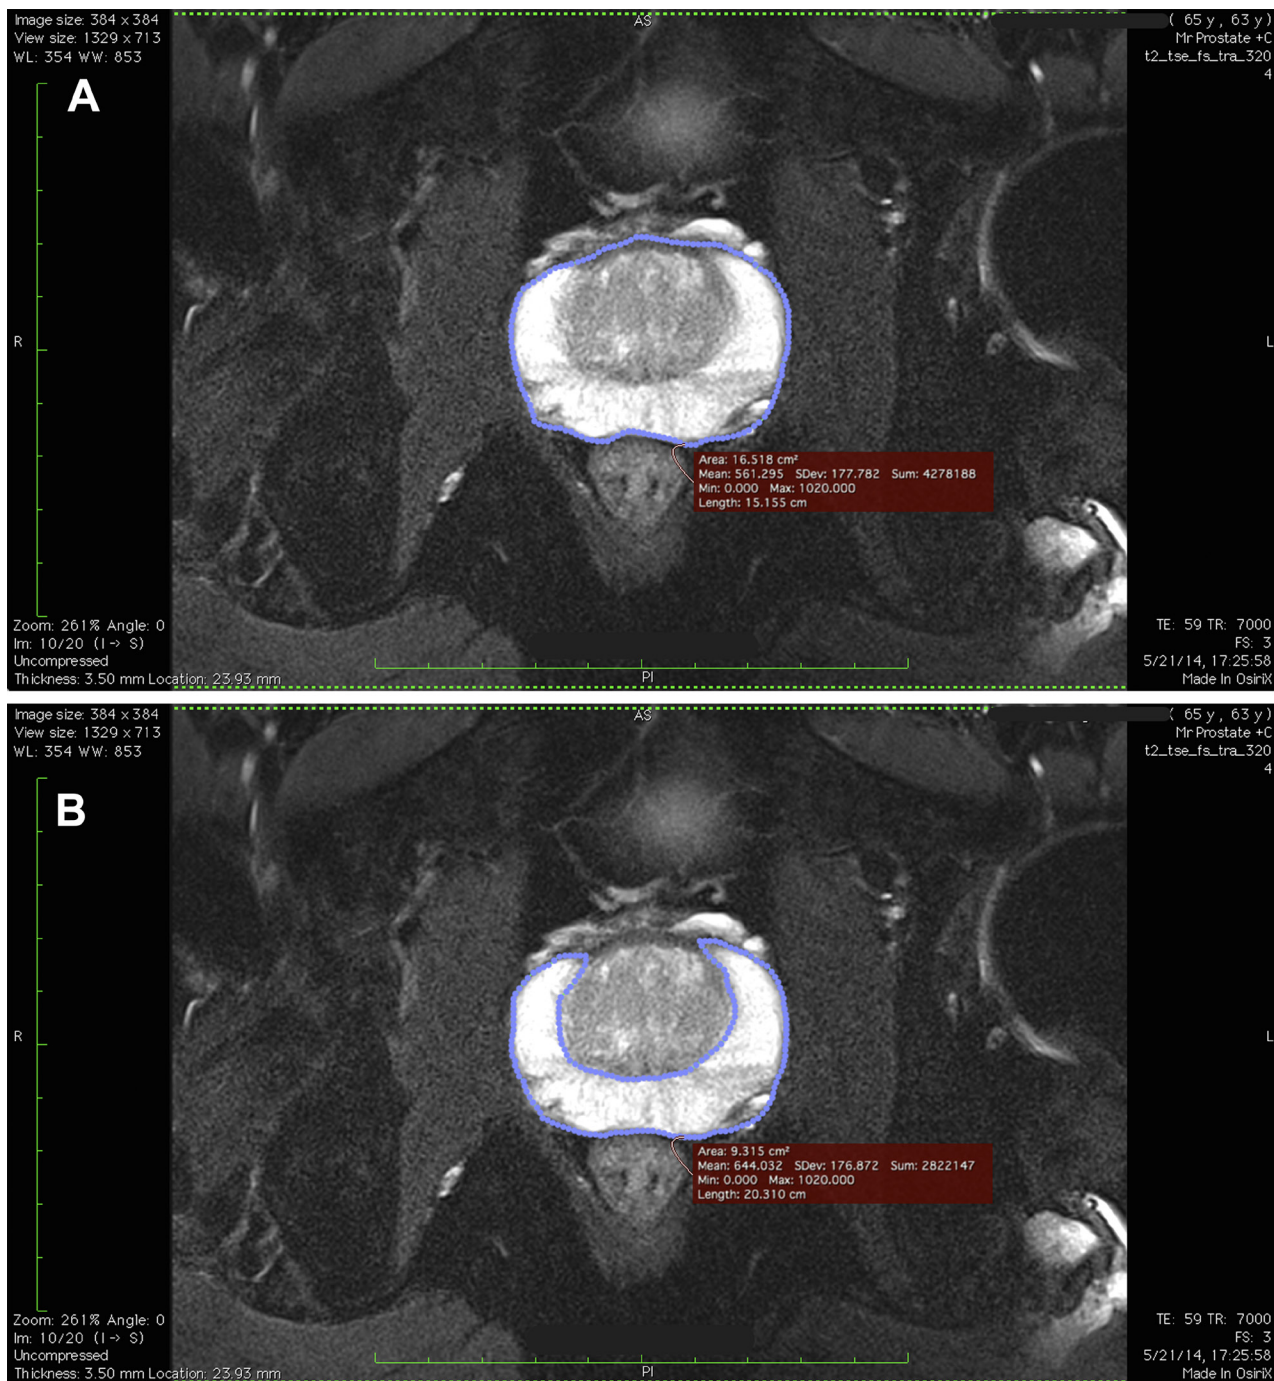

**Supplementary Figure 1:** Contoured total prostate (A) and peripheral zone (B) on axial fat-saturated T2WI MR images using a semi-automated segmentation tool.

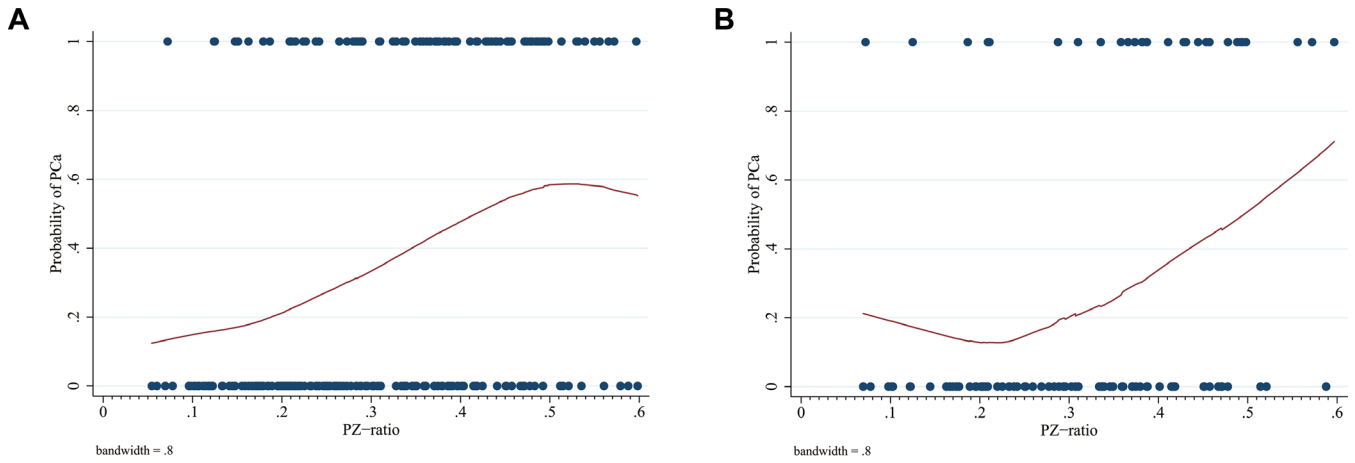

**Supplementary Figure 2:** PZ-ratio and PCa detection rate in all patient group (A) and in patients with PSA of 4–10 ng/ml (B).

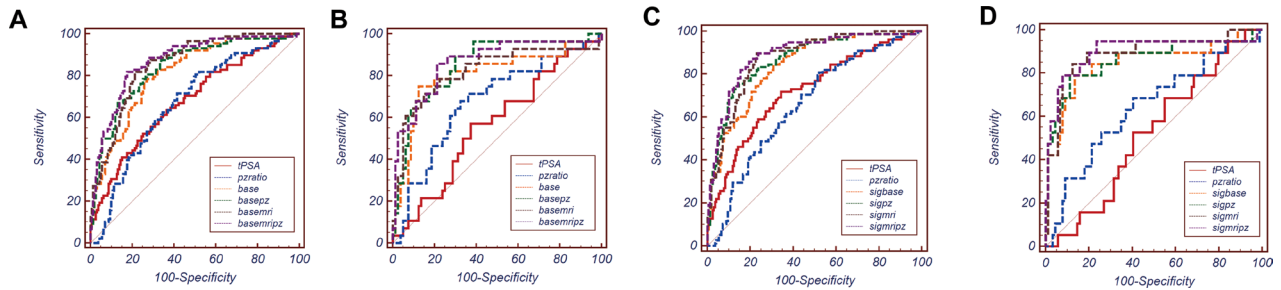

**Supplementary Figure 3:** ROC curve analysis of PSA, PZ-ratio, base model, base model + PZ, base model + MRI, and base model + MRI + PZ-ratio, in all PCa of all PSA group (A), patient with PSA of 4–10 ng/ml (B), clinically significant PCa of all PSA group (C), and patients with PSA of 4–10 ng/ml (D). basepz, base model + PZ-ratio; basemri, base model + MRI; basemripz, base model + MRI + PZ-ratio; sigbase, base model for significant PCa; sigpz, base model + PZ-ratio for significant PCa; sigmri, base model + MRI for significant PCa; sigmripz, base model + MRI + PZ-ratio for significant PCa.

**Supplementary Table 1: MRI protocols and main parameters**

| Protocols         | TR/TE (msec) | FOV (mm) | Pixel size (mm <sup>2</sup> ) | Matrix    | Thickness (mm) | TA (sec) |
|-------------------|--------------|----------|-------------------------------|-----------|----------------|----------|
| Axial-T2WI TSE    | 4000/104     | 180      | 0.5 × 0.5                     | 384 × 384 | 3.0            | 129      |
| Sagittal-T2WI TSE | 7500/97      | 200      | 0.8 × 0.8                     | 248 × 256 | 3.5            | 178      |
| Coronal-T2WI TSE  | 7500/97      | 200      | 0.8 × 0.8                     | 256 × 256 | 3.5            | 159      |
| Axial-T1WI TSE    | 750/13       | 300      | 0.6 × 0.6                     | 256 × 256 | 5.0            | 138      |
| Axial-DWI SS-EPI  | 5100/89      | 280      | 1.9 × 1.9                     | 120 × 150 | 3.0            | 479      |
| Axial-DCE FLASH   | 3.33/1.23    | 360      | 1.9 × 1.9                     | 124 × 192 | 3.0            | 313      |

TR/TE: repetition time/echo time; TA: acquisition time; FOV: field of view; TSE: turbo spin echo; SS-EPI: single shot-echo planar imaging; DWI: diffusion weighted imaging; FLASH: fast low angle shot; *b* values: 0, 50, 100, 150, 200, 500, 800, 1000, 1500, 2000 s/mm<sup>2</sup>.

**Supplementary Table 2: Sensitivity and specificity of PZ-ratio in predicting prostate cancer or significant prostate cancer in patients with PSA 4–10 ng/ml**

|                                   | Cutoff | Sensitivity | 95% CI    | Specificity | 95% CI    | +LR | -LR | +PV  | -PV  |
|-----------------------------------|--------|-------------|-----------|-------------|-----------|-----|-----|------|------|
| <b>Predicting PCa</b>             | 18.7%  | 89.3        | 71.8–97.7 | 17.5        | 9.9–27.6  | 1.1 | 0.6 | 27.5 | 82.4 |
|                                   | 30.3%  | 78.6        | 59.0–91.7 | 50.0        | 38.6–61.4 | 1.6 | 0.4 | 35.5 | 87.0 |
|                                   | 36.1%* | 67.9        | 47.6–84.1 | 67.5        | 56.1–77.6 | 2.1 | 0.5 | 42.2 | 85.7 |
|                                   | 40.2%  | 50.0        | 30.6–69.4 | 76.3        | 65.4–85.1 | 2.1 | 0.7 | 42.4 | 81.3 |
|                                   | 47.1%  | 28.6        | 13.2–48.7 | 90.0        | 81.2–95.6 | 2.9 | 0.8 | 50.0 | 78.3 |
| <b>Predicting Significant PCa</b> | 20.9%  | 89.5        | 66.9–98.7 | 27.0        | 18.1–37.4 | 1.2 | 0.4 | 20.7 | 92.3 |
|                                   | 28.3%  | 79.0        | 54.4–93.9 | 40.5        | 30.2–51.4 | 1.3 | 0.5 | 22.1 | 90.0 |
|                                   | 34.9%* | 68.4        | 43.4–87.4 | 59.6        | 48.6–69.8 | 1.7 | 0.5 | 26.5 | 89.8 |
|                                   | 40.2%  | 52.6        | 28.9–75.6 | 74.2        | 63.8–82.9 | 2.0 | 0.6 | 30.3 | 88.0 |
|                                   | 47.8%  | 31.6        | 12.6–56.6 | 91.0        | 83.1–96.0 | 3.5 | 0.8 | 42.9 | 86.2 |

PCa: prostate cancer; CI: confidence interval; +LR: positive likelihood ratio; -LR: negative likelihood ratio; +PV: positive predicted value; -PV: negative predicted value.

### Supplementary Table 3: Univariate logistic regression models predicting prostate cancer or significant prostate cancer

|                                                                       | All patients                    | Patients with PSA 4–10 ng/ml             |
|-----------------------------------------------------------------------|---------------------------------|------------------------------------------|
| <b>Predicting Prostate Cancer (OR (95% CI); <i>p</i>)</b>             |                                 |                                          |
| tPSA                                                                  | 1.0459 (1.0181–1.0746); < 0.001 | 1.159 (0.876–1.533); 0.302               |
| PZ-ratio                                                              | 47.196 (6.576–338.719); < 0.001 | 40.750 (1.634–1016.158); 0.024           |
| MRI                                                                   | 13.220 (6.353–27.509); < 0.001  | 10.552 (3.333–33.408); < 0.001           |
| PSAD                                                                  | 24.871 (6.338–97.599); < 0.001  | 71845.571 (95.649–53966146.022); < 0.001 |
| %fPSA                                                                 | 0.0004 (0.0001–0.0199); < 0.001 | 0.0001 (0.000001–0.103); 0.011           |
| <b>Predicting Significant Prostate Cancer (OR (95% CI); <i>p</i>)</b> |                                 |                                          |
| tPSA                                                                  | 1.058 (1.029–1.090); < 0.001    | 1.058 (0.770–1.453); 0.727               |
| PZ-ratio                                                              | 34.366 (4.679–252.413); < 0.001 | 18.720 (0.545–643.235); 0.105            |
| MRI                                                                   | 15.829 (6.863–36.509); < 0.001  | 27.771 (3.546–217.488); < 0.001          |
| PSAD                                                                  | 37.641 (9.021–157.051); < 0.001 | 8904.519 (12.544–6320924.785); 0.007     |
| %fPSA                                                                 | 0.0004 (0.0001–0.0271); < 0.001 | 0.0004 (0.00001–1.633); 0.0653           |

### Supplementary Table 4: Multivariate logistic regression models predicting prostate cancer

|                                                                       | All patients                        |                                 | Patients with PSA 4–10 ng/ml                                  |                                                 |
|-----------------------------------------------------------------------|-------------------------------------|---------------------------------|---------------------------------------------------------------|-------------------------------------------------|
|                                                                       | Base Model (OR (95% CI); <i>p</i> ) | Base Model + MRI + PZ-ratio     | Base Model                                                    | Base Model + MRI + PZ-ratio                     |
| <b>Predicting Prostate Cancer (OR (95% CI); <i>p</i>)</b>             |                                     |                                 |                                                               |                                                 |
| PZ-ratio                                                              | -                                   | 74.954 (4.327–1298.548); 0.003  | -                                                             | 49.196 (0.376–6430.528); 0.117                  |
| MRI findings                                                          | -                                   | 7.209 (3.1407–16.5473); < 0.001 | -                                                             | 5.837 (1.614–21.111); 0.007                     |
| Age                                                                   | 1.086 (1.045–1.128); < 0.001        | 1.075 (1.028–1.124); 0.002      | 1.107 (1.040–1.178); 0.001                                    | 1.088 (1.012–1.171); 0.023                      |
| PSAD                                                                  | 13.309 (3.173–55.831); < 0.001      | 5.669 (1.495–21.489); 0.011     | 3.691*10 <sup>4</sup> (12.814–1.063*10 <sup>8</sup> ); 0.010  | 2431.321 (0.499–1.185*10 <sup>7</sup> ); 0.072  |
| %fPSA                                                                 | 0.001 (0.00005–0.066); 0.002        | 0.024 (0.0003–1.840); 0.092     | 0.0002 (5.2*10 <sup>-8</sup> –1.066); 0.052                   | 0.013 (0.0001–28.396); 0.354                    |
| <b>Predicting Significant Prostate Cancer (OR (95% CI); <i>p</i>)</b> |                                     |                                 |                                                               |                                                 |
| PZ-ratio                                                              | -                                   | 75.030 (3.652–155.295); 0.005   | -                                                             | 219.123 (0.561–85639.848); 0.046                |
| MRI findings                                                          | -                                   | 7.980 (2.985–21.335); < 0.001   | -                                                             | 10.738 (1.239–93.043); 0.031                    |
| Age                                                                   | 1.108 (1.063–1.155); < 0.001        | 1.097 (1.045–1.115); < 0.001    | 1.178 (1.083–1.281); < 0.001                                  | 1.162 (1.057–1.278); 0.002                      |
| PSAD                                                                  | 25.028 (5.338–117.340); < 0.001     | 10.538 (2.375–46.758); 0.002    | 55423.021 (3.933–7.811*10 <sup>8</sup> ); 0.025               | 1395.000 (0.0699–2.783*10 <sup>7</sup> ); 0.152 |
| %fPSA                                                                 | 0.001 (0.00006–0.114); 0.005        | 0.032 (0.0003–3.056); 0.139     | 2.450*10 <sup>-4</sup> (2.100*10 <sup>-8</sup> –2.859); 0.082 | 0.029 (1.22*10 <sup>-6</sup> –685.082); 0.491   |

**Supplementary Table 5: Net benefit and reduction in avoidable biopsies in predicting significant prostate cancer for the Model and Model + MRI + PZ-ratio compared to the “treat all” strategy to biopsy every patient for different threshold probabilities in the same range**

|                                     |                                     | Threshold probability (%) | 10      | 15   | 20   | 25   | 30    | 35    | 40    |
|-------------------------------------|-------------------------------------|---------------------------|---------|------|------|------|-------|-------|-------|
| <b>All patients</b>                 | Net benefit                         | Model §                   | 25.9    | 27.7 | 24.6 | 20.6 | 17.9  | 14.1  | 12.0  |
|                                     |                                     | Model § + MRI + PZ-ratio  | 26.5    | 27.9 | 27.0 | 25.0 | 23.7  | 21.2  | 19.2  |
|                                     |                                     | Treat all                 | 23.9    | 24.2 | 19.5 | 14.2 | 8.0   | 1.0   | -7.2  |
|                                     | Net reduction in avoidable biopsies | Model §                   | 17.4    | 27.5 | 28.3 | 30.8 | 33.9  | 33.7  | 39.1  |
|                                     |                                     | Model § + MRI + PZ-ratio  | 23.1    | 31.2 | 38.1 | 41.4 | 44.7  | 45.7  | 48.8  |
|                                     | <b>Patients with PSA 4-10 ng/ml</b> | Net benefit               | Model § | 12.0 | 11.4 | 9.7  | 9.0   | 8.2   | 5.8   |
| Model § + MRI + PZ-ratio            |                                     |                           | 14.0    | 12.5 | 10.6 | 10.2 | 9.9   | 9.9   | 8.6   |
| Treat all                           |                                     |                           | 8.0     | 3.0  | -3.0 | -9.9 | -17.7 | -26.8 | -37.3 |
| Net reduction in avoidable biopsies |                                     | Model §                   | 29.6    | 47.2 | 50.9 | 56.5 | 60.5  | 60.4  | 63.9  |
|                                     |                                     | Model § + MRI + PZ-ratio  | 53.7    | 53.4 | 54.6 | 60.2 | 64.5  | 68.1  | 69.0  |

PZ-ratio: peripheral zone ratio. MRI: magnetic resonance imaging; PSA: prostate-specific antigen;

§ The Model consisted of age, %fPSA and PSAD.

**Supplementary Table 6: Number of significant prostate cancer missed and reduction in biopsies according to threshold probability in the range of 10–40% for the base model and base model + MRI + PZ-ratio for all patients and patients with PSA 4–10 ng/ml**

|                                     | Probability cut-off, % | Model                         | Significant PCa missed, No. (%) | Unnecessary biopsies <sup>**</sup> spared, No. (%) |
|-------------------------------------|------------------------|-------------------------------|---------------------------------|----------------------------------------------------|
| <b>All patients</b>                 | 10                     | Base model ‡                  | 1 (1.3%)                        | 42 (24.8%)                                         |
|                                     |                        | Base model ‡ + MRI + PZ-ratio | 1 (1.3%)                        | 56 (33.2)                                          |
|                                     | 15                     | Base model ‡                  | 2 (2.6%)                        | 66 (39.0%)                                         |
|                                     |                        | Base model ‡ + MRI + PZ-ratio | 3 (3.8%)                        | 74 (43.8%)                                         |
|                                     | 20                     | Base model ‡                  | 3 (3.8%)                        | 67 (39.6%)                                         |
|                                     |                        | Base model ‡ + MRI + PZ-ratio | 4 (5.1%)                        | 90 (53.3%)                                         |
|                                     | 25                     | Base model ‡                  | 3 (3.8%)                        | 73 (43.2%)                                         |
|                                     |                        | Base model ‡ + MRI + PZ-ratio | 4 (5.1%)                        | 98 (58.1%)                                         |
|                                     | 30                     | Base model ‡                  | 3 (3.8%)                        | 81 (47.8%)                                         |
|                                     |                        | Base model ‡ + MRI + PZ-ratio | 4 (5.1%)                        | 106 (63.0%)                                        |
|                                     | 35                     | Base model ‡                  | 3 (3.8%)                        | 80 (47.5%)                                         |
|                                     |                        | Base model ‡ + MRI + PZ-ratio | 5 (6.4%)                        | 108 (63.8%)                                        |
|                                     | 40                     | Base model ‡                  | 5 (6.4%)                        | 92 (54.2%)                                         |
|                                     |                        | Base model ‡ + MRI + PZ-ratio | 6 (7.7%)                        | 115 (67.8%)                                        |
| <b>Patients with PSA 4–10 ng/ml</b> | 10                     | Base model ‡                  | 2 (10.5%)                       | 30 (33.7%)                                         |
|                                     |                        | Base model ‡ + MRI + PZ-ratio | 1 (5.3%)                        | 57 (64.0%)                                         |
|                                     | 15                     | Base model ‡                  | 2 (10.5%)                       | 49 (55.1%)                                         |
|                                     |                        | Base model ‡ + MRI + PZ-ratio | 1 (5.3%)                        | 57 (63.7%)                                         |
|                                     | 20                     | Base model ‡                  | 2 (10.5%)                       | 53 (59.6%)                                         |
|                                     |                        | Base model ‡ + MRI + PZ-ratio | 1 (5.3%)                        | 58 (65.2%)                                         |
|                                     | 25                     | Base model ‡                  | 2 (10.5%)                       | 59 (66.3%)                                         |
|                                     |                        | Base model ‡ + MRI + PZ-ratio | 1 (5.3%)                        | 64 (71.9%)                                         |
|                                     | 30                     | Base model ‡                  | 3 (15.8%)                       | 62 (70.0%)                                         |
|                                     |                        | Base model ‡ + MRI + PZ-ratio | 2 (10.5%)                       | 68 (79.3%)                                         |
|                                     | 35                     | Base model ‡                  | 3 (15.8%)                       | 62 (70.0%)                                         |
|                                     |                        | Base model ‡ + MRI + PZ-ratio | 3 (15.8%)                       | 71 (79.3%)                                         |
|                                     | 40                     | Base model ‡                  | 3 (15.8%)                       | 66 (74.1%)                                         |
|                                     |                        | Base model ‡ + MRI + PZ-ratio | 3 (15.8%)                       | 71 (80.3%)                                         |

PCa = prostate cancer; PZ-ratio: peripheral zone ratio. MRI: magnetic resonance imaging.

‡The base model consisted of age, %fPSA and PSAD.

\*\* Unnecessary biopsies were defined as: negative biopsy or insignificant prostate cancer.
